# Supplementary material for: Detergent-free decellularization of bovine costal cartilage for chondrogenic differentiation of human adipose mesenchymal stem cells in vitro
Source: Royal Society of Chemistry journal article supplement (doi:10.1039/c6ra16647d), 2016-01-01
Supplement: c6ra16647d1.pdf [file c6ra16647d1.pdf]

**Detergent-free Decellularization of Bovine Costal Cartilage for Chondrogenic Differentiation of Human Adipose Mesenchymal Stem Cells *in Vitro***

Evren Erten<sup>a</sup>, Tugba Sezgin Arslan<sup>a</sup>, Burak Derkus<sup>b</sup> and Yavuz Emre Arslan<sup>a,\*</sup>

<sup>a</sup>Regenerative Biomaterials Laboratory, Department of Bioengineering, Engineering Faculty, Canakkale Onsekiz Mart University, Canakkale 17100, Turkey

<sup>b</sup>Bioelectrochemistry Laboratory, Department of Chemistry, Ankara University, Tandogan, Ankara 06100, Turkey

\*Corresponding author: yavuzea@gmail.com

Tel.: +90-286-218-0018; Fax: +90-286-218-0541

**Supplementary Material**

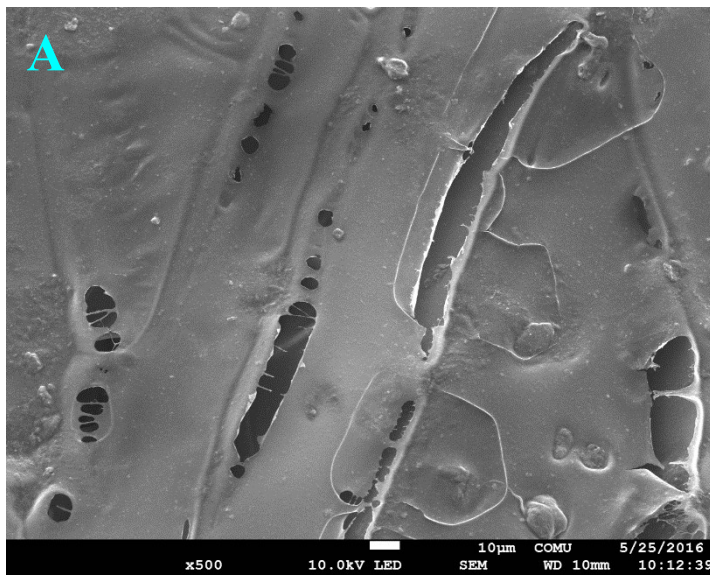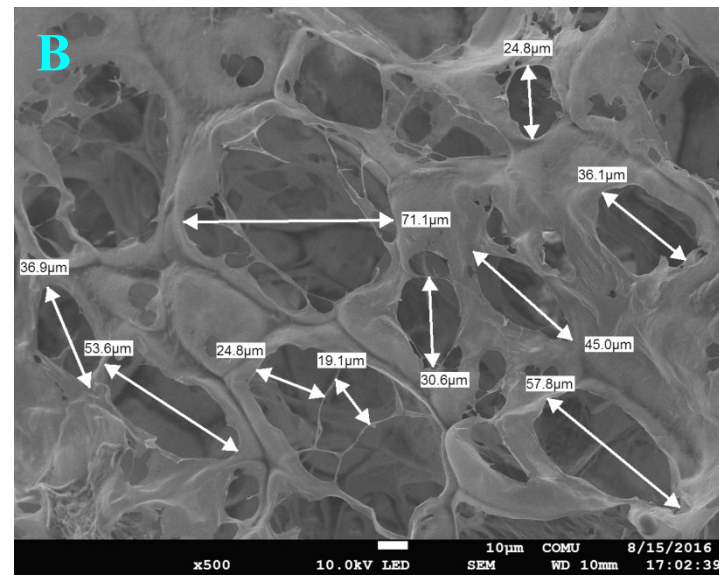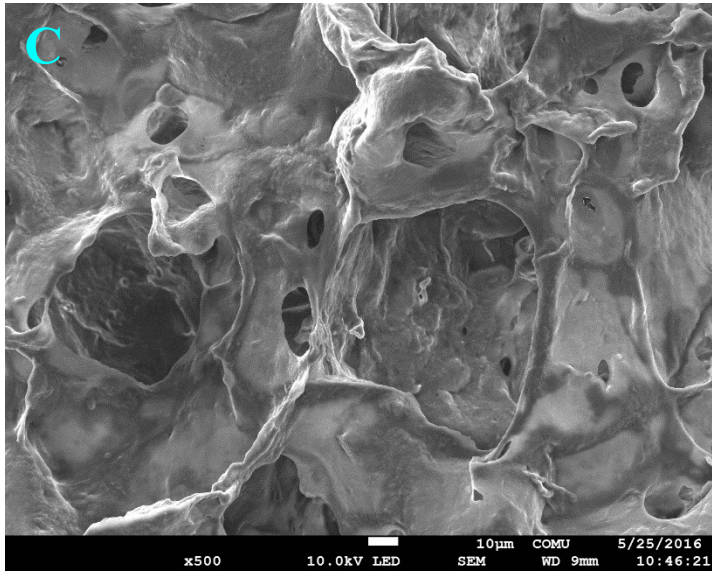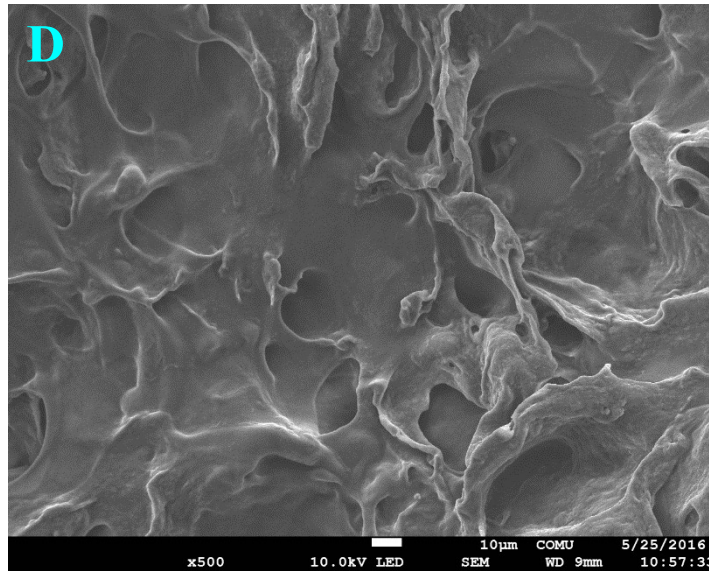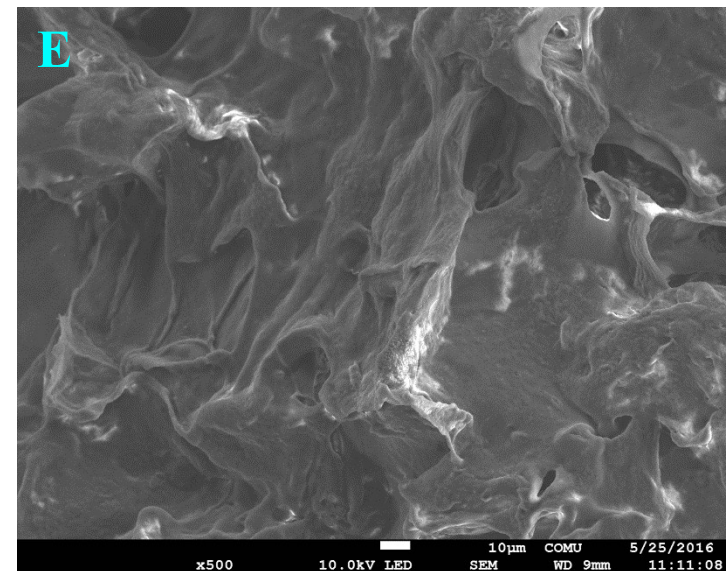

**Figure S1.** (A) SEM micrograph related to untreated CEbS (500x magnification). (B) SEM micrograph related to detergent-free decellularized CEbS (500x magnification). SEM micrograph related to recellularized CEbS (C) Day 14, (D) Day 21, and (E) Day 28 (500x magnification).
